# Supplementary material for: ULK2 suppresses ovarian cancer cell migration and invasion by elevating IGFBP3
Source: PeerJ. 2024 Jun 28;12:e17628. doi: 10.7717/peerj.17628 (PMC11216209; doi:10.7717/peerj.17628)
Supplement: Supplemental Information 8 [file peerj-12-17628-s008.xlsx]

## Sheet: Sheet1
			Raw date
	Immunochemistry (IHC) used in Fig. 1 and SFig.1
	Expression of ULK2 in benign ovarian cysts or tumors (n = 81).
	Number	Positive Area (%)	H-Score
	1	0.1879	25.3816
	2	0.4069	59.4328
	3	0.2081	27.2861
	4	0.4282	59.2209
	5	0.1265	16.3573
	6	0.5226	83.7058
	7	0.3834	56.2634
	8	0.3484	50.4889
	9	0.3222	46.6226
	10	0.2285	33.1981
	11	0.3391	49.4669
	12	0.3976	60.167
	13	0.3026	43.616
	14	0.2167	27.8209
	15	0.356	51.2456
	16	0.2475	35.8406
	17	0.675	113.926
	18	0.3122	44.2945
	19	0.32	47.796
	20	0.1086	15.6119
	21	0.2277	30.0717
	22	0.3242	46.6554
	23	0.1864	23.9252
	24	0.2904	42.7085
	25	0.1336	18.0182
	26	0.4819	70.3408
	27	0.4356	67.7595
	28	0.3821	62.6104
	29	0.4157	62.7413
	30	0.3615	59.8249
	31	0.1245	16.2068
	32	0.306	42.6923
	33	0.2244	29.4319
	34	0.2	29.7224
	35	0.223	31.1661
	36	0.1684	28.0204
	37	0.4781	77.0309
	38	0.3556	51.2158
	39	0.3314	51.186
	40	0.3027	46.1535
	41	0.3667	60.3662
	42	0.4062	59.8854
	43	0.3726	52.1399
	44	0.2396	35.5279
	45	0.2972	41.4003
	46	0.2977	43.9453
	47	0.1827	25.5522
	48	0.2954	44.502
	49	0.3203	46.0962
	50	0.5205	80.1673
	51	0.3911	57.1297
	52	0.3131	44.8431
	53	0.3979	57.1148
	54	0.1663	24.1612
	55	0.3826	56.8444
	56	0.1828	27.0203
	57	0.0724	9.1161
	58	0.2106	28.5127
	59	0.4344	66.4136
	60	0.4569	70.8684
	61	0.3925	60.9543
	62	0.2425	33.6352
	63	0.6537	101.141
	64	0.2208	30.5867
	65	0.3819	58.858
	66	0.2257	32.4391
	67	0.2942	41.3123
	68	0.3571	53.0768
	69	0.4459	68.2393
	70	0.3308	48.1819
	71	0.3717	52.5203
	72	0.4207	75.3783
	73	0.1557	22.1408
	74	0.2962	44.1782
	75	0.4785	75.3799
	76	0.3215	46.4754
	77	0.5163	82.9909
	78	0.3281	49.7514
	79	0.4007	58.5386
	80	0.352	51.6573
	81	0.3292	56.6631
	Expression of ULK2 in epithelial ovarian cancer (n = 80)
	Number	Positive Area (%)	H-Score
	1	0.4293	63.1575
	2	0.242	36.2301
	3	0.0477	7.087
	4	0.125	16.8065
	5	0.0648	8.892
	6	0.0291	3.4773
	7	0.4267	65.6096
	8	0.3092	46.3165
	9	0.285	42.0081
	10	0.0506	6.0086
	11	0.0192	2.4114
	12	0.3731	65.3843
	13	0.0522	7.5941
	14	0.0372	5.3272
	15	0.0519	6.3366
	16	0.1169	15.8829
	17	0.043	5.8247
	18	0.0083	1.0509
	19	0.1535	18.4649
	20	0.1043	14.6706
	21	0.0615	6.7399
	22	0.1877	25.8272
	23	0.0344	6.4159
	24	0.0319	4.4645
	25	0.0174	2.3695
	26	0.0703	8.0052
	27	0.1151	13.9869
	28	0.2085	24.9333
	29	0.1308	17.631
	30	0.2763	38.5667
	31	0.3009	45.8577
	32	0.5033	74.789
	33	0.0761	10.8714
	34	0.114	14.7384
	35	0.0117	1.4864
	36	0.2252	36.2434
	37	0.1029	14.534
	38	0.0699	9.7269
	39	0.0056	0.7256
	40	0.0875	11.3123
	41	0.2819	36.0255
	42	0.246	35.7114
	43	0.0323	4.7017
	44	0.1866	27.743
	45	0.2525	40.7606
	46	0.0828	11.7913
	47	0.0393	5.1421
	48	0.1219	16.4191
	49	0.0219	2.671
	50	0.1522	21.5801
	51	0.371	62.3206
	52	0.4679	77.8871
	53	0.0627	8.9116
	54	0.0403	6.042
	55	0.2557	40.9526
	56	0.2501	33.8582
	57	0.0546	6.4714
	58	0.0356	4.5792
	59	0.1032	13.4985
	60	0.0224	2.6993
	61	0.2904	40.7629
	62	0.0758	10.6473
	63	0.0204	2.6314
	64	0.023	3.1055
	65	0.1484	21.3729
	66	0.0305	4.1772
	67	0.0732	9.1201
	68	0.0635	8.4927
	69	0.0574	7.7447
	70	0.308	44.2076
	71	0.1963	24.9572
	72	0.1786	27.9061
	73	0.0794	12.1018
	74	0.0061	0.7952
	75	0.0242	2.7029
	76	0.033	4.6232
	77	0.2037	31.3285
	78	0.083	11.9901
	79	0.014	1.8432
	80	0.0177	2.0575
	Western Blot used in Fig.3.
Fig. 3B	ULK2
	β-actin
Fig. 3C	ULK2
	β-actin
	Transwell migration assay used in Fig. 3 and Sfig.2.
	OVCA433-Control
	OVCA433-UlK2 overexpression
	HEY A8-Control
	HEY A8-ULK2 overexpression
	Migrated ovarian cancer cells
		Control			ULK2 OE
	OVCA433	666	560	588	311	345	325
	HEY A8	858	752	701	377	383	429
	Transwell invasion assay used in Fig. 3 and Sfig.2.
	OVCA433-Control
	OVCA433-ULK2 overexpression
	HEY A8-Control
	HEY A8-ULK2 overexpression
	Invasive ovarian cancer cells
		Control			ULK2 OE
	OVCA433	470	487	408	307	265	305
	HEY A8	589	655	465	208	265	297
	Differential gene expression (DGE) analysis of RNA sequencing (Figure 4C)
		IGFBP3	MTX1P1	TNFSF15	EGR1	DDIT4	ABCG1	OLAH	DHRS2	U2AF1	DDIT3
	ULK2-OE	70.2371	3.71061	0.816997	0.202752	14.2141	0.773551	0.0605572	0	3.12745	2.97388
	ULK2-OE	70.2371	2.43947	0.989094	0.738553	6.01635	0.445303	0	0.0452653	3.68503	1.51196
	ULK2-OE	70.626	3.2252	1.07805	0.521471	12.895	0.824999	0.121892	0	0.628226	1.41486
	Control	31.057	25.1316	2.36472	2.62907	24.5111	1.985	0.567898	0.176096	0.451316	5.74676
	Control	30.9827	23.0486	2.06228	1.92246	23.6256	1.398	0.733261	0.184063	0.176289	4.48949
	Control	31.4068	11.4908	2.511	1.9156	24.2702	1.60864	1.05468	0.298182	0.313224	3.87761
	Western Blot used in Fig. 4.
Fig. 4D	IGFBP3
	β-actin
